# Supplementary material
Source: publisher figshare collection journal article supplement (https://gsapubs.figshare.com/ndownloader/files/23315819)
Supplement: Supplementary file 1 [file 23315819]

## Sheet: Sheet1
DSDP 211
Sample	Depth	Carbonate_wt_%	Organic_C_wt_%	d13C_carbonate	d13C_organic_C	Data_source		d18O_carb
	1.86	0	0.853	nd	-22.066	4		nd
	2.69	0	0.374	nd	-22.547	4		nd
	7.13	0	0.552	nd	-19.134	4		nd
	7.58	1	0.2	nd	nd	2		nd
	13.61	0	0.856	nd	-21.456	4		nd
	62.54	0	0.45	nd	-21.496	4		nd
	96.75	0	0.26	nd	-22.294	4		nd
	98.32	0	0.523	nd	-22.902	4		nd
	134.86	0	0.25	nd	-22.828	4		nd
	137.77	0	0.272	nd	-22.719	4		nd
	182.37	0	0.133	nd	-24.767	4		nd
	185.59	0	0.266	nd	-22.391	4		nd
	185.69	0	0.27	nd	-22.606	4		nd
	188.47	0	0.196	nd	-24.626	4		nd
	229.31	0	0.252	nd	-22.646	4		nd
	257.27	0	0.238	nd	-21.876	4		nd
	295.59	0	0.364	nd	-21.829	4		nd
	297.71	0	0.249	nd	-22.427	4		nd
	411.74	12	0	nd	nd	2		nd
	411.95	67	0	nd	nd	2		nd
211-13R-1 W, 26.0--27.0 cm	418.765	0.5553	0.044177	-1.10283	nd	1		nd
Basaltic basement
211-14R-2 W, 27.5--28.5 cm basalt	429.78	0	0	nd	nd	1		nd
211-14R-2 W, 27.5--28.5 cm vein	429.78	44.32	bdl	1.68	nd	1		29.5715
211-14R-2 W, 27.5--28.5 cm alteration rim	429.78	2.09	bdl	-0.6	nd	1		27.9465
211-15R-1 W, 35.0--36.5 cm	437.858	0	0.0445455	nd	nd	1		nd
211-15R-4 W, 34.0--35.5 cm	442.348	0	0.0486357	nd	nd	1		nd
211-15R-4 W, 34.0--35.5 cm	442.348	48.79	bdl	1.368	nd	1		30.1377
DSDP 213
Sample	Depth	Carbonate_wt_%	Organic_C_wt_%	d13C_carbonate	d13C_organic_C	Data_source		d18O_carb
213-1R-3 W, 125.0--126.0 cm	4.255	0	0.15	nd	-23.26	1		nd
213-7R-1 W, 76.0--77.0 cm	57.265	0	0.2	nd	-24.11	1		nd
213-8R-5 W, 75.0--76.0 cm	72.755	2.81	0.14	nd	-23.8	1		nd
213-12R-4 W, 72.0--73.0 cm	109.225	0	0.09	nd	-24.54	1		nd
213-14R-3 W, 75.0--76.0 cm	126.755	0	0.26	nd	-15.77	1		nd
213-15R-6 W, 100.0--101.0 cm	141.005	83.6985	0	1.542	-23.26	1		28.9951
DSDP 260
Sample	Depth	Carbonate_wt_%	Organic_C_wt_%	d13C_carbonate	d13C_organic_C	Data_source		d18O_carbonate
	0.2	65	0.1	nd	nd	3		nd
	3.3	5	0.2	nd	nd	3		nd
	47.3	89	0.1	nd	nd	3		nd
260-2R-3 W, 99.0--100.0 cm	47.995	79.8493	0.0689333	0.829	-23.811	1		30.7529
	92.9	0	0.2	nd	nd	3		nd
	94.7	0	0.2	nd	nd	3		nd
	97.7	86	0.1	nd	nd	3		nd
260-3R-5 W, 75.0--76.0 cm	98.255	80.7505	0	1.3605	nd	1		19.7777
	129.7	11	0.5	nd	nd	3		nd
	135.7	33	0.5	nd	nd	3		nd
	158.2	1	0.1	nd	nd	3		nd
260-5R-6 W, 75.0--76.0 cm	166.255	0	0.113348	nd	-28.378	1		nd
	177.5	43	0.1	nd	nd	3		nd
	196.2	0	0.1	nd	nd	3		nd
	199.2	0	0.1	nd	nd	3		nd
	202.2	0	0.1	nd	nd	3		nd
	221.8	0	0.1	nd	nd	3		nd
260-8R-6 W, 75.0--76.0 cm	223.255	0	0.0460061	nd	nd	1		nd
260-9R-1 W, 144.0--145.0 cm	235.445	22.2901	0	4.28983	-24.695	1		29.826
	244.3	58	0.1	nd	nd	3		nd
	253.2	54	0.1	nd	nd	3		nd
	262.9	38	0.1	nd	nd	3		nd
260-12R-1 W, 52.0--55.0 cm	263.035	18.2163	0.0347257	3.39	-26.66	1		30.2991
	272.6	10	0.1	nd	nd	3		nd
260-13R-1 W, 80.5--82.0 cm	272.812	11.8102	0.0403874	2.655	-26.829	1		29.4069
	282.4	0	0.1	nd	nd	3		nd
	294.2	2	0.2	nd	nd	3		nd
260-15R-4 W, 72.0--74.0 cm	296.23	8.07592	0.131232	0.495167	-25.738	1		nd
	301.3	2	0.1	nd	nd	3		nd
260-16R-2 W, 61.0--62.0 cm	302.615	0	0.216543	nd	-26.829	1		nd
260-17R-1 W, 99.0--100.0 cm	310.995	29.0549	0	2.016	-25.518	1		28.4432
	311.3	26	0.1	nd	nd	3		nd
	320.5	23	0.1	nd	nd	3		nd
Basaltic basement
260-20R-1 W, 40.0--42.5 cm	329.413	0	0.0464959	nd	nd	3		nd
DSDP 261
Sample	Depth	Carbonate_wt_%	Organic_C_wt_%	d13C_carbonate	d13C_organic_C	Data_source		d18O_carbonate
261-2R-2 W, 86.0--89.0 cm	11.875	0	0.490447	nd	-21.315	1		nd
	48.5	64	0.1	nd	nd	3		nd
	50.7	48	0.3	nd	nd	3		nd
261-3R-4 W, 25.0--26.0 cm	52.255	6.91152	0	-3.32983	nd	1		nd
	95.9	73	0.2	nd	nd	3		nd
261-4R-2 W, 26.0--27.0 cm	96.765	72.4742	0	0.672	nd	1		29.8546
	162.2	0	0.1	nd	nd	3		nd
261-5R-1 W, 71.0--72.0 cm	162.215	2.89907	0.0638465	-8.5	-24.839	1		nd
	171.2	0	0.1	nd	nd	3		nd
	174.2	0	0.1	nd	nd	3		nd
261-6R-3 W, 75.0--76.0 cm	174.755	0	0	nd	-26.171	1		nd
	177.2	0	0.1	nd	nd	3		nd
	180.7	0	0.1	nd	nd	3		nd
	183.7	0	0.1	nd	nd	3		nd
	193.2	0	0	nd	nd	3		nd
261-8R-3 W, 72.0--73.0 cm	193.725	2.75981	0.092289	-8.5	-24.985	1		nd
	196.2	0	0.1	nd	nd	3		nd
	201.2	0	0.1	nd	nd	3		nd
	202.7	0	0.1	nd	nd	3		nd
	230	1	0.4	nd	nd	3		nd
	247.2	0	0.1	nd	nd	3		nd
261-14R-1 W, 83.5--85.0 cm	247.843	0	0.183986	nd	-25.096	1		nd
	256.6	0	1.4	nd	nd	3		nd
	266.9	0	0.3	nd	nd	3		nd
	305.2	0	0.2	nd	nd	3		nd
	305.7	0	0.3	nd	nd	3		nd
261-19R-2 W, 75.0--76.0 cm	306.255	0.904934	0.194551	nd	-25.739	1		nd
	307.3	0	0.2	nd	nd	3		nd
	308.7	0	0.1	nd	nd	3		nd
	310.2	0	0.1	nd	nd	3		nd
	315.2	0	0.2	nd	nd	3		nd
	333	0	0.1	nd	nd	3		nd
	336.9	1	0.1	nd	nd	3		nd
	342.2	0	0.1	nd	nd	3		nd
	345.2	0	0.1	nd	nd	3		nd
261-22R-3 W, 75.0--76.0 cm	345.755	0	0.218036	nd	-24.902	1		nd
	348.2	0	0.2	nd	nd	3		nd
	361.2	0	0.2	nd	nd	3		nd
	364.2	0	0.3	nd	nd	3		nd
	380.7	0	0.2	nd	nd	3		nd
261-25R-2 W, 65.0--66.0 cm	401.155	0	0.304391	nd	-26.653	1		nd
	402.2	0	0.2	nd	nd	3		nd
	418.3	1	0.2	nd	nd	3		nd
	437.3	0	0.1	nd	nd	3		nd
	447.3	28	0.1	nd	nd	3		nd
	449.7	1	0	nd	nd	3		nd
261-28R-3 W, 75.0--76.0 cm	450.255	28.8375	0	1.132	-26.617	1		27.3742
	467.2	1	0	nd	nd	3		nd
261-29R-2 W, 80.0--81.0 cm	467.805	5.72928	0.035569	0.763	-25.589	1		27.4968
	468.7	3	0.1	nd	nd	3		nd
	486.2	21	0.2	nd	nd	3		nd
	487.7	34	0.1	nd	nd	3		nd
	505.2	3	0.1	nd	nd	3		nd
	506.7	13	0.1	nd	nd	3		nd
	508.2	2	0.1	nd	nd	3		nd
261-31R-4 W, 61.0--62.0 cm	508.615	18.9123	0.079056	-1.42	-25.664	1		26.25
	509.7	0	0.1	nd	nd	3		nd
	524.2	6	0.1	nd	nd	3		nd
	525.7	10	0.1	nd	nd	3		nd
261-32R-3 W, 75.0--76.0 cm	526.255	3.95353	0.0766836	0.206	-28.095	1		26.9899
261-33R-1 W, 13.0--16.0 cm	532.145	0	0	nd	nd	1		nd
Basaltic basement
261-37R-2 W, 29.5--30.5 cm basalt	554.3	2.01445	0.0256757	-0.858	nd	1		25.6327
261-37R-2 W, 29.5--30.5 cm vein	554.3	84.81	0	1.05	nd	1		25.0164
261-39R-1 W, 70.0--71.5 cm basalt	570.707	0	0.031266	nd	nd	1		nd
261-39R-1 W, 70.0--71.5 cm matrix	570.707	82.64	0	1.764	nd	1		29.8944
261-39R-1 W, 70.0--71.5 cm alteration rim	570.707	0.6	0	nd	nd	1		nd
DSDP 262
Sample	Depth	Carbonate_wt_%	Organic_C_wt_%	d13C_carbonate	d13C_organic_C	Data_source		d18O_carbonate
	3.2	47	0.6	nd	nd	3		nd
	8.2	43	1.1	nd	nd	3		nd
262-3R-2 W, 24.0--25.0 cm	16.245	31.1386	0.299203	0.225	-19.916	1		29.0308
	17.7	33	1.2	nd	nd	3		nd
	20.6	34	1.3	nd	nd	3		nd
	27.2	32	1.3	nd	nd	3		nd
	34	24	1.2	nd	nd	3		nd
	36.7	33	1.4	nd	nd	3		nd
	39.7	33	1.1	nd	nd	3		nd
	43.2	33	1.3	nd	nd	3		nd
	46.2	37	1.3	nd	nd	3		nd
	49.2	37	1.3	nd	nd	3		nd
262-6R-5 W, 33.0--34.0 cm	49.335	35.1016	0.365438	0.598	-19.471	1		29.039
	56.3	36	1.3	nd	nd	3		nd
	58.7	34	1.3	nd	nd	3		nd
	62.2	31	1.1	nd	nd	3		nd
	65.2	33	1.2	nd	nd	3		nd
	68.2	34	1.1	nd	nd	3		nd
	72.3	34	1	nd	nd	3		nd
	74.7	34	1.1	nd	nd	3		nd
	77.7	31	1.1	nd	nd	3		nd
	81.2	31	1	nd	nd	3		nd
	84.2	30	1	nd	nd	3		nd
	87.2	74	0.3	nd	nd	3		nd
	90.7	28	0.7	nd	nd	3		nd
	93.7	29	0.9	nd	nd	3		nd
	96.8	34	0.8	nd	nd	3		nd
262-11R-5 W, 76.0--77.0 cm	97.265	23.0206	0	0.0216	nd	1		28.3952
	100.2	30	0.9	nd	nd	3		nd
	103.2	74	0.3	nd	nd	3		nd
	106.2	28	0.8	nd	nd	3		nd
	109.7	31	1	nd	nd	3		nd
	112.7	29	1	nd	nd	3		nd
	115.7	26	0.8	nd	nd	3		nd
	119.2	30	0.9	nd	nd	3		nd
	122.2	29	0.9	nd	nd	3		nd
	125.2	32	0.9	nd	nd	3		nd
	128.7	32	0.8	nd	nd	3		nd
	131.7	30	0.7	nd	nd	3		nd
	134.7	32	0.8	nd	nd	3		nd
	138.2	30	0.8	nd	nd	3		nd
	141.2	30	0.8	nd	nd	3		nd
	144.2	29	0.7	nd	nd	3		nd
	147.7	37	0.9	nd	nd	3		nd
	150.7	34	1.3	nd	nd	3		nd
262-17R-4 W, 78.0--79.0 cm	152.785	30.6403	0.608399	-0.0645	-20.35	1		29.3047
	153.7	40	0.4	nd	nd	3		nd
	157.2	29	1	nd	nd	3		nd
	160.2	32	1	nd	nd	3		nd
	163.2	30	1	nd	nd	3		nd
	166.7	31	0.8	nd	nd	3		nd
	169.7	31	0.8	nd	nd	3		nd
	172.7	30	0.9	nd	nd	3		nd
	176.2	32	0.6	nd	nd	3		nd
	179.2	31	0.6	nd	nd	3		nd
	182.2	37	0.6	nd	nd	3		nd
	185.7	33	0.8	nd	nd	3		nd
	188.7	38	1	nd	nd	3		nd
	191.7	34	0.9	nd	nd	3		nd
	198.2	30	0.7	nd	nd	3		nd
262-22R-4 W, 25.0--26.0 cm	199.755	16.8267	0.432512	0.114	-21.461	1		28.9511
	201.2	32	0.7	nd	nd	3		nd
	207.7	42	0.5	nd	nd	3		nd
	210.7	39	0.9	nd	nd	3		nd
	214.2	36	0.8	nd	nd	3		nd
	217.2	36	0.8	nd	nd	3		nd
	220.2	36	0.7	nd	nd	3		nd
	226.7	37	1	nd	nd	3		nd
	229.7	40	0.9	nd	nd	3		nd
	233.2	45	0.7	nd	nd	3		nd
	236.2	41	0.7	nd	nd	3		nd
	239.2	48	0.7	nd	nd	3		nd
	242.7	41	0.9	nd	nd	3		nd
	245.7	43	0.7	nd	nd	3		nd
	248.7	47	0.7	nd	nd	3		nd
262-27R-5 W, 25.0--26.0 cm	248.755	42.2984	0.453689	0.614	-21.359	1		29.4284
	261.7	62	0.8	nd	nd	3		nd
	264.7	65	0.4	nd	nd	3		nd
	267.7	59	0.7	nd	nd	3		nd
	271.2	58	0.7	nd	nd	3		nd
	274.2	67	0.6	nd	nd	3		nd
	277.2	64	0.8	nd	nd	3		nd
	281.6	67	0.5	nd	nd	3		nd
	283.7	61	0.5	nd	nd	3		nd
	286.7	65	0.6	nd	nd	3		nd
	290.2	70	0.9	nd	nd	3		nd
	293.2	62	0.8	nd	nd	3		nd
	296.2	68	0.6	nd	nd	3		nd
	299.9	67	0.9	nd	nd	3		nd
262-33R-2 W, 25.0--26.0 cm	301.255	61.0948	0.178594	0.539	-19.202	1		30.1816
	302.7	63	0.9	nd	nd	3		nd
	305.7	62	1	nd	nd	3		nd
	309.2	65	0.9	nd	nd	3		nd
	312.2	64	0.9	nd	nd	3		nd
	319	72	0.7	nd	nd	3		nd
	321.7	66	0.9	nd	nd	3		nd
	324.7	62	0.7	nd	nd	3		nd
	328.2	48	1	nd	nd	3		nd
	331.2	59	1.1	nd	nd	3		nd
	334.2	58	0.9	nd	nd	3		nd
	337.7	64	0.8	nd	nd	3		nd
	340.7	67	0.7	nd	nd	3		nd
	343.6	69	0.6	nd	nd	3		nd
	347	62	0.7	nd	nd	3		nd
	350.2	79	0.5	nd	nd	3		nd
262-38R-3 W, 25.0--26.0 cm	350.255	76.247	0	-0.105	-21.413	1		30.0477
	353.2	82	0.3	nd	nd	3		nd
	359.7	77	0.4	nd	nd	3		nd
	362.7	80	0.3	nd	nd	3		nd
	366.2	57	0.5	nd	nd	3		nd
	369.2	57	0.5	nd	nd	3		nd
	372.3	80	0.4	nd	nd	3		nd
	378.7	89	0.2	nd	nd	3		nd
	381.7	78	0.4	nd	nd	3		nd
	385.2	64	0.5	nd	nd	3		nd
	388.2	56	0.4	nd	nd	3		nd
262-42R-5 W, 25.0--26.0 cm	391.255	65.7816	0.44885	-0.177	-20.152	1		29.7912
	391.5	78	0.3	nd	nd	3		nd
	404	80	0.3	nd	nd	3		nd
	405.7	77	0.3	nd	nd	3		nd
	407.2	80	0.3	nd	nd	3		nd
	413.6	99	0.1	nd	nd	3		nd
	414.7	99	0.2	nd	nd	3		nd
	419.7	98	0.2	nd	nd	3		nd
262-45R-6 W, 115.0--116.0 cm	422.155	101.781	0	0.802	nd	1		28.387
ODP 765
Sample	Depth	Carbonate_wt_%	Organic_C_wt_%	d13C_carbonate	d13C_organic_C	Data_source		d18O_carbonate
	0.53	68.3	0.8	nd	nd	6		nd
	0.96	13	bdl	nd	nd	6		nd
	2.28	52.5	bdl	nd	nd	6		nd
	3.42	35.7	bdl	nd	nd	6		nd
	4.45	68.5	0.33	nd	nd	6		nd
	4.88	0.4	bdl	nd	nd	6		nd
	4.98	55.2	0.63	nd	nd	6		nd
	5	55.23	0.63	nd	nd	5		nd
	5.95	67.3	0.43	nd	nd	6		nd
	5.95	72.5	1.33	nd	nd	6		nd
	5.97	71.1	0.8	nd	nd	6		nd
	8.11	2.5	bdl	nd	nd	6		nd
	8.18	72.3	bdl	nd	nd	6		nd
	9.83	71.4	bdl	nd	nd	6		nd
	12.95	2.9	bdl	nd	nd	6		nd
	13.2	56.06	0.51	nd	nd	5		nd
	13.24	56.1	0.51	nd	nd	6		nd
	13.5	3.42	0.82	nd	nd	5		nd
	13.53	3.4	0.82	nd	nd	6		nd
	13.75	0.8	1.08	nd	nd	6		nd
	13.87	5.4	0.98	nd	nd	6		nd
	13.9	5.41	0.98	nd	nd	5		nd
	14.1	67.81	0.74	nd	nd	5		nd
	14.11	67.8	0.74	nd	nd	6		nd
	14.7	81.38	0.13	nd	nd	5		nd
	14.71	81.4	0.13	nd	nd	6		nd
	15.1	1	0.67	nd	nd	5		nd
	15.11	1	0.67	nd	nd	6		nd
	15.25	0.3	1.06	nd	nd	6		nd
	17.14	0.3	bdl	nd	nd	6		nd
	17.55	29.3	bdl	nd	nd	6		nd
	18.18	0.6	0.72	nd	nd	6		nd
	18.2	0.58	0.72	nd	nd	5		nd
	19.1	70.64	0.22	nd	nd	5		nd
	19.13	70.6	0.22	nd	nd	6		nd
	19.15	65.8737	0.3072	1.69	-19.69	4		30.56
	19.63	69.4	bdl	nd	nd	6		nd
	23.25	0.4	1.18	nd	nd	6		nd
	24.55	1.6	bdl	nd	nd	6		nd
	24.75	0.3	1.09	nd	nd	6		nd
	26.07	54.6	bdl	nd	nd	6		nd
	26.53	66.1	bdl	nd	nd	6		nd
	32.95	56.6	0.94	nd	nd	6		nd
	33	0.5	1.05	nd	nd	6		nd
	35.78	17.8	bdl	nd	nd	6		nd
	36.2	2.42	0.91	nd	nd	5		nd
	36.2	2.4	0.91	nd	nd	6		nd
	36.23	0.163816	bdl	-1.63	nd	4		30.25
	40.45	31.7	bdl	nd	nd	6		nd
	42.55	56.2	0.55	nd	nd	6		nd
	42.6	55.7	0.57	nd	nd	6		nd
	47.5	74.47	0.13	nd	nd	5		nd
	47.5	74.5	0.13	nd	nd	6		nd
	52.25	62.1	0.51	nd	nd	6		nd
	52.3	56.9	0.98	nd	nd	6		nd
	56.29	32.7	bdl	nd	nd	6		nd
	57.48	bdl	0.2202	nd	nd	5		nd
	60.78	70.3	0.58	nd	nd	6		nd
	60.8	70.31	0.58	nd	nd	5		nd
	61.85	62.1	0.71	nd	nd	6		nd
	61.9	69.2	1.08	nd	nd	6		nd
	64.45	65.6	bdl	nd	nd	6		nd
	71.55	70.9	0.97	nd	nd	6		nd
	71.6	71.1	0.69	nd	nd	6		nd
	74.45	38.8889	bdl	0.64	-19.04	4		30.05
	74.49	48.9	bdl	nd	nd	6		nd
	74.89	bdl	0.0607	nd	nd	5		nd
	75.45	46.9	0.29	nd	nd	6		nd
	75.5	46.9	0.29	nd	nd	5		nd
	81.25	71.8	0.08	nd	nd	6		nd
	81.3	74.8	0.01	nd	nd	6		nd
	82.19	68.5	bdl	nd	nd	6		nd
	85.28	49.3496	bdl	1.39	nd	4		30.04
	85.3	55.31	0.66	nd	nd	5		nd
	85.34	55.3	0.66	nd	nd	6		nd
	90.85	57.9	0.27	nd	nd	6		nd
	90.9	61.3	0.16	nd	nd	6		nd
	92.09	0.9	bdl	nd	nd	6		nd
	93.2	4.83	bdl	nd	nd	5		nd
	93.24	4.8	bdl	nd	nd	6		nd
	93.29	bdl	0.5466	nd	-19.44	4		nd
	97.69	0.6	bdl	nd	nd	6		nd
	97.9	61.89	0.15	nd	nd	5		nd
	97.9	61.9	0.15	nd	nd	6		nd
	100.5	56.8	0.55	nd	nd	6		nd
	110.05	72.2	0.08	nd	nd	6		nd
	110.1	67.8	0.47	nd	nd	6		nd
	110.5	69.81	0.04	nd	nd	5		nd
	110.54	69.8	0.04	nd	nd	6		nd
	112.29	8.7	bdl	nd	nd	6		nd
	114.15	0.5	0.27	nd	nd	6		nd
	114.2	0.5	0.27	nd	nd	5		nd
	118	bdl	0.3249	nd	nd	5		nd
	118.08	60.9	0.31	nd	nd	6		nd
	118.1	60.89	0.31	nd	nd	5		nd
	119.7	62.9	0.06	nd	nd	6		nd
	120.24	61.1	bdl	nd	nd	6		nd
	129.3	53.2	0.68	nd	nd	6		nd
	130.1	62.31	0.12	nd	nd	5		nd
	130.13	62.3	0.12	nd	nd	6		nd
	132.7	41	bdl	nd	nd	6		nd
	134.91	78.6	bdl	nd	nd	6		nd
	136.76	60.9456	0.3176	-0.29	-19.7	4		27.5
	136.8	60	0.3	nd	nd	5		nd
	136.88	0.0647978	bdl	nd	nd	5		nd
	136.88	0.5	0.29	nd	nd	6		nd
	136.9	0.5	0.29	nd	nd	5		nd
	137.15	45.6263	bdl	nd	nd	5		nd
	137.15	63.1	0.09	nd	nd	6		nd
	137.2	63.47	0.05	nd	nd	5		nd
	137.5	59.64	0.24	nd	nd	5		nd
	137.5	59.6	0.24	nd	nd	6		nd
	137.7	73.22	0.08	nd	nd	5		nd
	137.7	68.2801	bdl	-0.08	nd	4		27.62
	137.7	73.2	0.08	nd	nd	6		nd
	137.8	1.17	0.29	nd	nd	5		nd
	137.82	0.435321	0.398	-1.04	-21.678	4		30.51
	137.82	1.2	0.29	nd	nd	6		nd
	138.26	59.9	0.31	nd	nd	6		nd
	138.95	9.9	0.5	nd	nd	6		nd
	139	24.6	0.32	nd	nd	6		nd
	140.7	36.49	0.31	nd	nd	5		nd
	140.73	36.5	0.31	nd	nd	6		nd
	140.99	58.8	0.19	nd	nd	6		nd
	141	58.81	0.19	nd	nd	5		nd
	141.66	58.5	0.11	nd	nd	6		nd
	141.7	58.48	0.11	nd	nd	5		nd
	144	57.48	0.13	nd	nd	5		nd
	144.02	55.433	bdl	0.58	-21.3	4		28.59
	144.02	57.5	0.13	nd	nd	6		nd
	144.6	57.23	0.13	nd	nd	5		nd
	144.62	57.2	0.13	nd	nd	6		nd
	144.7	52.743	bdl	1.12	nd	4		29.92
	148.7	44.4	0.61	nd	nd	6		nd
	158.4	22.7	0.33	nd	nd	6		nd
	160.46	bdl	0.2067	nd	nd	5		nd
	160.46	65.873	bdl	1.21	-22.133	4		29.05
	160.5	51.98	0.08	nd	nd	5		nd
	160.53	52	0.08	nd	nd	6		nd
	161.4	2.3	bdl	nd	nd	6		nd
	163.73	3.35032	bdl	0.719	nd	4		29.57
	163.76	60.1	0.3	nd	nd	6		nd
	167.5	68.3	0.3	nd	nd	6		nd
	168.95	70	0.27	nd	nd	6		nd
	171.64	1.3	bdl	nd	nd	6		nd
	176.5	61.3681	bdl	1.19	nd	4		28.09
	177.75	41.9	0.57	nd	nd	6		nd
	185.75	74.7	bdl	nd	nd	6		nd
	185.8	74.72	bdl	nd	nd	5		nd
	187.5	36.7	1	nd	nd	6		nd
	193.37	56.5	bdl	nd	nd	6		nd
	195.65	80.9	0.22	nd	nd	6		nd
	195.7	80.3	0.28	nd	nd	6		nd
	196.34	3.30755	bdl	2.04	nd	4		34.74
	197.08	72.5	bdl	nd	nd	6		nd
	203.28	63.1252	0.1892	0.478	-20.68	4		29.09
	203.3	73.8	0.07	nd	nd	5		nd
	203.34	73.8	0.07	nd	nd	6		nd
	204.7	62	bdl	nd	nd	6		nd
	206.27	85.8	bdl	nd	nd	6		nd
	206.9	72.6	0.21	nd	nd	6		nd
	207.5	82.6	bdl	nd	nd	6		nd
	212.41	75.5	bdl	nd	nd	6		nd
	213.6	63.4	0	nd	nd	6		nd
	214	80.4	bdl	nd	nd	6		nd
	214.51	68.6379	bdl	1.78	nd	4		30.06
	222.45	72.3	bdl	nd	nd	6		nd
	224.58	74.6	bdl	nd	nd	6		nd
	226.25	89.1	0.07	nd	nd	6		nd
	226.3	70.4	0.23	nd	nd	6		nd
	227.07	10.5789	bdl	1.97	nd	4		33.49
	227.15	63.1	bdl	nd	nd	6		nd
	232	62.5	bdl	nd	nd	6		nd
	241.83	76.7015	bdl	1.59	nd	4		30.86
	241.89	91.6	0	nd	nd	6		nd
	241.9	91.96	0	nd	nd	5		nd
	243.71	69.9	bdl	nd	nd	6		nd
	244.33	78.6	bdl	nd	nd	6		nd
	244.9	68.89	0.13	nd	nd	5		nd
	244.92	68.9	0.13	nd	nd	6		nd
	245.65	66.6	0.14	nd	nd	6		nd
	251.3	74.89	0.26	nd	nd	5		nd
	251.31	23.3777	bdl	nd	-26.724	4		13.28
	251.31	74.6	0.26	nd	nd	6		nd
	251.38	74.1	bdl	nd	nd	6		nd
	253.85	69.2	0.44	nd	nd	6		nd
	253.9	79.1	0.13	nd	nd	6		nd
	254.54	60.5	bdl	nd	nd	6		nd
	260.79	79	bdl	nd	nd	6		nd
	260.88	62.7058	0.3216	2.37	-19.86	4		30.98
	260.9	80.88	0.25	1.32	nd	4		nd
	260.94	80.9	0.25	nd	nd	6		nd
	263	71.5	bdl	nd	nd	6		nd
	263.55	81.1	0.17	nd	nd	6		nd
	271.07	53.4	bdl	nd	nd	6		nd
	271.7	77.5	0.32	nd	nd	6		nd
	271.91	79.4902	bdl	1.71	nd	4		29.56
	280.25	77.8	bdl	nd	nd	6		nd
	280.76	63.411	bdl	1.43	nd	4		30.63
	280.85	84.7	0.24	nd	nd	6		nd
	291.89	70.6	bdl	nd	nd	6		nd
	294	79.8	0.14	nd	nd	6		nd
	294.1	72.8	0.19	nd	nd	6		nd
	294.2	80.6	bdl	nd	nd	6		nd
	299.75	77.6	bdl	nd	nd	6		nd
	302.06	83.742	bdl	nd	nd	5		29.98
	302.06	82.2	0.13	nd	nd	6		nd
	302.1	82.22	0.13	nd	nd	5		nd
	302.25	90.6	0.39	nd	nd	6		nd
	302.59	80.8	bdl	nd	nd	6		nd
	310.11	73.1	bdl	nd	nd	6		nd
	311.2	68.81	0.01	nd	nd	5		nd
	311.21	68.8	0.01	nd	nd	6		nd
	313.5	80.1	0.12	nd	nd	6		nd
	314.34	80.3	bdl	nd	nd	6		nd
	319.58	78.1	bdl	nd	nd	6		nd
	320.11	83.3	0.17	nd	nd	6		nd
	321.9	33.8799	bdl	1.82	nd	4		30.12
	329.4	80.2	bdl	nd	nd	6		nd
	329.8	80.1	0.32	nd	nd	6		nd
	330.17	78.5151	0.1783	1.95	-20.6	4		30.33
	339.4	70.9	0	nd	nd	6		nd
	339.79	86.6	bdl	nd	nd	6		nd
	340.21	87.4562	bdl	2.24	nd	4		30.38
	340.8	78.7	0.29	nd	nd	6		nd
	347.92	87.1	bdl	nd	nd	6		nd
	348.958	83.6	0.17	nd	nd	6		nd
	350.43	95.1	bdl	nd	nd	6		nd
	350.7	73.3059	0.3945	2.35	-19.29	4		29.66
	357.1	76.8	0.18	nd	nd	6		nd
	358.14	82.4	bdl	nd	nd	6		nd
	358.69	91.5	bdl	nd	nd	6		nd
	362	81.2602	bdl	1.77	nd	4		30.55
	366.9	21.0624	bdl	2.04	nd	4		32.63
	367.05	78.5	bdl	nd	nd	6		nd
	367.46	95.4	0	nd	nd	6		nd
	367.51	95.1	0.12	nd	nd	6		nd
	370.61	7.79075	bdl	2.48	nd	4		35.04
	372.3	71.9	bdl	nd	nd	6		nd
	376.4	72.9	0.29	nd	nd	6		nd
	382	51.8	bdl	nd	nd	6		nd
	383.4	71.6	0.09	nd	nd	6		nd
	392.05	7.75505	bdl	1.71	nd	4		30.29
	399.73	73.2573	0.336	1.64	-18.978	4		28.44
	402.8	80.2	bdl	nd	nd	6		nd
	409.45	59.8	bdl	nd	nd	6		nd
	409.77	4.61299	bdl	2.11	nd	4		32.77
	410.11	84.3	bdl	nd	nd	6		nd
	410.29	61	bdl	nd	nd	6		nd
	410.48	7.3	bdl	nd	nd	6		nd
	413.25	17.9	bdl	nd	nd	6		nd
	420.34	30.0855	bdl	1.96	nd	4		27.5
	420.65	49	bdl	nd	nd	6		nd
	423.06	16.8	bdl	nd	nd	6		nd
	423.18	65.4	bdl	nd	nd	6		nd
	423.35	88.5	bdl	nd	nd	6		nd
	430.3	59	bdl	nd	nd	6		nd
	438	12.6	bdl	nd	nd	6		nd
	440.9	50.9	0.21	nd	nd	6		nd
	446.8	32.9	0.31	nd	nd	5		nd
	446.84	4.77234	0.1113	nd	-26.022	4		nd
	446.84	32.9	0.31	nd	nd	6		nd
	446.88	71.7018	bdl	-3.31	nd	4		28.35
	446.91	79.074	bdl	2.17	nd	4		29.95
	446.97	70.0947	0.1079	1.7	-21.603	4		30.63
	446.97	81.8	0	nd	nd	6		nd
	447	81.8	0	nd	nd	5		nd
	447.19	80.7	0.09	nd	nd	6		nd
	447.2	80.72	0.09	nd	nd	5		nd
	447.3	83.8	0.04	nd	nd	5		nd
	447.33	83.8	0.04	nd	nd	6		nd
	449	99.1	bdl	nd	nd	6		nd
	451.1	1.08	0.18	nd	nd	5		nd
	451.11	1.1	0.18	nd	nd	6		nd
	459.65	64.6	bdl	nd	nd	6		nd
	464.6	76.1	bdl	nd	nd	6		nd
	466.7	4.08	0	nd	nd	5		nd
	466.71	4.1	0	nd	nd	6		nd
	474.1	51.1	bdl	nd	nd	6		nd
	475.07	0.0471321	bdl	-1.46	nd	4		28.66
	483.7	8.1	bdl	nd	nd	6		nd
	484.85	2.3	0.2	nd	nd	6		nd
	493.2	1.3	bdl	nd	nd	6		nd
	493.58	0.5	bdl	nd	nd	6		nd
	493.99	47.3	bdl	nd	nd	6		nd
	497.15	57.3	bdl	nd	nd	6		nd
	498.6	51.8	bdl	nd	nd	6		nd
	504.56	54.2	0	nd	nd	6		30.41
	504.6	54.23	0	2.22	nd	4		nd
	504.93	0.3	bdl	nd	nd	6		nd
	505.4	4.3	bdl	nd	nd	6		nd
	506.63	69.3	bdl	nd	nd	6		nd
	511.9	1.2	bdl	nd	nd	6		nd
	516.3	76.5	0	nd	nd	6		nd
	516.4	76.5	bdl	nd	nd	6		nd
	522	81.3	bdl	nd	nd	6		nd
	522.8	29.8	bdl	nd	nd	6		nd
	523.52	0.4	bdl	nd	nd	6		nd
	524.77	0.6	bdl	nd	nd	6		nd
	531.57	0.153581	bdl	nd	nd	5		nd
	532.25	1.5	bdl	nd	nd	6		nd
	540.4	1.2	bdl	nd	nd	6		nd
	551.88	1.02594	bdl	nd	nd	5		nd
	551.88	2.4	0.04	nd	nd	6		nd
	551.9	2.42	0.04	nd	nd	5		nd
	553	68.6	0	nd	nd	6		nd
	554.62	3.3	bdl	nd	nd	6		nd
	564.82	62.3661	bdl	3.44	nd	4		28.98
	566.25	32.4	bdl	nd	nd	6		nd
	570.2	0.33	0.03	nd	nd	5		nd
	570.22	0.04486	bdl	nd	nd	5		nd
	570.22	0.3	0.03	nd	nd	6		nd
	573.8	57.6	bdl	nd	nd	6		nd
	573.84	79	bdl	nd	nd	6		nd
	574.42	2.3	bdl	nd	nd	6		nd
	574.43	70.8	bdl	nd	nd	6		nd
	574.5	0.67	0	nd	nd	5		nd
	574.51	0.144866	bdl	nd	nd	5		nd
	574.51	0.6	0.05	nd	nd	6		nd
	574.62	60.7	bdl	nd	nd	6		nd
	579.92	68.771	bdl	nd	nd	5		nd
	580.8	0.5	0.04	nd	nd	6		nd
	581.4	0.42	0.03	nd	nd	5		nd
	581.42	0.4	bdl	nd	nd	6		nd
	581.46	0.4	0.03	nd	nd	6		nd
	581.86	56.2	bdl	nd	nd	6		nd
	583.06	0.5	0.03	nd	nd	6		nd
	583.1	0.5	0.03	nd	nd	5		nd
	584.85	56.9	bdl	nd	nd	6		nd
	584.9	63.8	0	nd	nd	6		nd
	592.58	35.7	bdl	nd	nd	6		nd
	592.92	4.9	0.01	nd	nd	6		nd
	593	4.83	0.02	nd	nd	5		nd
	593.59	0.3	bdl	nd	nd	6		nd
	593.6	0.4	bdl	nd	nd	6		nd
	593.67	0.7	0.09	nd	nd	6		nd
	593.93	12.5	bdl	nd	nd	6		nd
	598.19	0.3	bdl	nd	nd	6		nd
	598.36	0.4	bdl	nd	nd	6		nd
	598.7	13.3	bdl	nd	nd	6		nd
	598.95	3.2	bdl	nd	nd	6		nd
	599.3	0.25	0.01	nd	nd	5		nd
	599.34	0.0386315	bdl	nd	nd	5		nd
	599.41	0.3	0.01	nd	nd	6		nd
	607.55	0.0233666	bdl	nd	nd	5		nd
	607.55	0.2	0.01	nd	nd	6		nd
	607.55	0.2	bdl	nd	nd	6		nd
	607.6	0.17	0.01	nd	nd	5		nd
	608.45	33.1	bdl	nd	nd	6		nd
	609.32	0.3	0.01	nd	nd	6		nd
	609.65	14.9	bdl	nd	nd	6		nd
	609.9	7.7	bdl	nd	nd	6		nd
	609.9	16.2	0	nd	nd	6		nd
	610.45	14.3127	bdl	3.46	nd	4		29.05
	610.5	22.24	0.11	nd	nd	5		nd
	610.52	22.3	0.1	nd	nd	6		nd
	619.42	33.7	bdl	nd	nd	6		nd
	620.16	2.58874	bdl	nd	nd	5		nd
	620.2	5.33	0.06	nd	nd	5		nd
	620.23	5.3	0.06	nd	nd	6		nd
	622.66	0.0662705	bdl	nd	nd	5		nd
	626.67	0.3	bdl	nd	nd	6		nd
	627.55	0.6	0.04	nd	nd	6		nd
	627.6	0.67	0.03	nd	nd	5		nd
	628.44	0.4	0	nd	nd	6		nd
	629.66	0.0898473	bdl	nd	nd	5		nd
	630.42	2	bdl	nd	nd	6		nd
	630.5	3.3	bdl	nd	nd	6		nd
	630.64	4	bdl	nd	nd	6		nd
	630.64	4.4	bdl	nd	nd	6		nd
	630.72	2.4	bdl	nd	nd	6		nd
	630.81	6.7	bdl	nd	nd	6		nd
	630.92	0.3	bdl	nd	nd	6		nd
	631.03	0.3	bdl	nd	nd	6		nd
	631.12	0.3	bdl	nd	nd	6		nd
	631.3	0.2	0.05	nd	nd	6		nd
	631.38	0.0233293	bdl	nd	nd	5		nd
	631.4	0.17	0.05	nd	nd	5		nd
	631.91	0.7	bdl	nd	nd	6		nd
	632	1.3	bdl	nd	nd	6		nd
	632.1	0.5	bdl	nd	nd	6		nd
	632.21	0.3	bdl	nd	nd	6		nd
	632.31	0.3	bdl	nd	nd	6		nd
	633.93	0.4	0	nd	nd	6		nd
	634.28	9.3	bdl	nd	nd	6		nd
	634.39	8.4	0.06	nd	nd	6		nd
	638.01	26.3	0	nd	nd	6		nd
	638.18	25.1	bdl	nd	nd	6		nd
	647.37	0.3	bdl	nd	nd	6		nd
	647.9	3	bdl	nd	nd	6		nd
	654.9	3	0.58	nd	nd	6		nd
	656.18	0.6	bdl	nd	nd	6		nd
	657.37	0.139621	bdl	nd	nd	5		nd
	665.9	4.3	bdl	nd	nd	6		nd
	668.55	21.7	0.1	nd	nd	6		nd
	675.55	19.3	bdl	nd	nd	6		nd
	677.3	0.33	0.13	nd	nd	5		nd
	677.34	0.0753089	bdl	nd	nd	5		nd
	677.35	0.3	0.13	nd	nd	6		nd
	677.65	6.6	bdl	nd	nd	6		nd
	677.96	4.7	0.67	nd	nd	6		nd
	678	4.66	0.67	nd	nd	5		nd
	679.43	10.8	bdl	nd	nd	6		nd
	690.75	0.8	bdl	nd	nd	6		nd
	695.93	17.5	bdl	nd	nd	6		nd
	696.4	33.0858	0.04	4.55	nd	4		28.74
	696.4	34.5	0.06	nd	nd	6		nd
	697.1	54.9	bdl	nd	nd	6		nd
	697.4	51.9	0.15	nd	nd	6		nd
	705.45	1.6	bdl	nd	nd	6		nd
	714.7	26.2	bdl	nd	nd	6		nd
	715.63	3.3	bdl	nd	nd	6		nd
	715.7	1	0.04	nd	nd	5		nd
	715.71	0.325358	bdl	nd	nd	5		nd
	715.71	1	0.04	nd	nd	6		nd
	716.1	20.6	0	nd	nd	6		nd
	724.9	0.5	0.22	nd	nd	5		nd
	724.94	0.7	0.2	nd	nd	6		nd
	725.35	10.1	bdl	nd	nd	6		nd
	726.83	0.5	bdl	nd	nd	6		nd
	726.89	0.7	0.6	nd	nd	6		nd
	730.99	0.8	bdl	nd	nd	6		nd
	740.75	0.6	bdl	nd	nd	6		nd
	741.7	0.58	0.15	nd	nd	5		nd
	741.71	0.2057	0.1811	nd	-23.56	4		nd
	741.71	0.6	0.15	nd	nd	6		nd
	743.68	1.7	0.25	nd	nd	6		nd
	744.2	0.6	0.08	nd	nd	6		nd
	744.3	0.8	bdl	nd	nd	6		nd
	744.56	0.5	bdl	nd	nd	6		nd
	744.6	0.7	bdl	nd	nd	6		nd
	756.6	0.8	bdl	nd	nd	6		nd
	760.73	0.029159	bdl	nd	nd	5		nd
	761.59	0.7	bdl	nd	nd	6		nd
	761.67	4	bdl	nd	nd	6		nd
	762.56	1.1	0.51	nd	nd	6		nd
	762.85	1	0.43	nd	nd	6		nd
	763	27.2	bdl	nd	nd	6		nd
	763.55	0.145795	bdl	nd	-24.861	4		nd
	763.55	1.1	0.29	nd	nd	6		nd
	763.6	1.08	0.29	nd	nd	5		nd
	763.63	0.5	bdl	nd	nd	6		nd
	770.4	0.67	0.09	nd	-26.38	4		nd
	770.4	0.7	0.09	nd	nd	6		nd
	770.41	0.0857618	0.1137	nd	nd	5		nd
	771.68	8.2	bdl	nd	nd	6		nd
	771.73	3	bdl	nd	nd	6		nd
	772.6	3.6	0.14	nd	nd	6		nd
	773.7	2.3	4.92	nd	nd	6		nd
	774.2	5.4	bdl	nd	nd	6		nd
	779.25	0.7	bdl	nd	nd	6		nd
	790.95	0.5	bdl	nd	nd	6		nd
	793.35	0.4	bdl	nd	nd	6		nd
	801.3	1	0.4	nd	nd	6		nd
	801.4	0.5	bdl	nd	nd	6		nd
	801.76	5.3	bdl	nd	nd	6		nd
	803.97	0.6	bdl	nd	nd	6		nd
	807.24	1.1	0.51	nd	nd	6		nd
	807.52	0.3	bdl	nd	nd	6		nd
	807.71	1	0.53	nd	nd	6		nd
	810.8	2.1	bdl	nd	nd	6		nd
	816.7	0.58	0.01	nd	nd	5		nd
	816.7	0.0788081	bdl	nd	nd	4		nd
	816.7	0.6	0.01	nd	nd	6		nd
	817.9	0.8	bdl	nd	nd	6		nd
	818.55	0.4	bdl	nd	nd	6		nd
	821.77	0.9	bdl	nd	nd	6		nd
	821.88	1.3	bdl	nd	nd	6		nd
	821.98	53.2	bdl	nd	nd	6		nd
	823.61	0.4	bdl	nd	nd	6		nd
	825.8	0.42	0.18	nd	nd	5		nd
	825.84	0.4	0.18	nd	nd	6		nd
	829.4	1.4	0	nd	nd	6		nd
	831	0.4	bdl	nd	nd	6		nd
	832.52	0.4	bdl	nd	nd	6		nd
	835.82	0.6	0.3	nd	nd	6		nd
	836.08	0.4	bdl	nd	nd	6		nd
	837.34	0.7	0.08	nd	nd	6		nd
	837.34	0.3	bdl	nd	nd	6		nd
	837.45	0.3	bdl	nd	nd	6		nd
	838.15	2.4	bdl	nd	nd	6		nd
	838.33	1.3	bdl	nd	nd	6		nd
	838.61	1	bdl	nd	nd	6		nd
	844.76	0.0971967	bdl	nd	nd	5		nd
	845.12	0.6	bdl	nd	nd	6		nd
	847.82	0.3	bdl	nd	nd	6		nd
	848.87	8	bdl	nd	nd	6		nd
	849.1	5.2	bdl	nd	nd	6		nd
	849.25	6.6	bdl	nd	nd	6		nd
	852.83	0.3	bdl	nd	nd	6		nd
	857.9	0.3	0.14	nd	nd	6		nd
	858	0.3	bdl	nd	nd	6		nd
	858.49	0.3	bdl	nd	nd	6		nd
	858.72	3	bdl	nd	nd	6		nd
	859.1	7.3	bdl	nd	nd	6		nd
	859.39	14.7	bdl	nd	nd	6		nd
	865.32	1.5	bdl	nd	nd	6		nd
	866	20.5	bdl	nd	nd	6		nd
	866.07	21.5	bdl	nd	nd	6		nd
	866.86	25.3	bdl	nd	nd	6		nd
	867.52	15.068	0.1204	1.12	-25.828	4		28.52
	875.08	1.4	bdl	nd	nd	6		nd
	875.2	24.9	bdl	nd	nd	6		nd
	877.09	21.7	bdl	nd	nd	6		nd
	878.09	15.2	bdl	nd	nd	6		nd
	878.4	18.9	bdl	nd	nd	6		nd
	885.8	27.8	bdl	nd	nd	6		nd
	886.1	28.2	0.07	nd	nd	6		nd
	890.55	1.4	bdl	nd	nd	6		nd
	896.37	0.049375	bdl	nd	nd	5		nd
	896.37	0.3	0.01	nd	nd	6		nd
	896.4	0.33	0.01	nd	nd	5		nd
	901.13	0.5	0.08	nd	nd	6		nd
	901.39	0.4	0.05	nd	nd	6		nd
	901.63	0.4	0.07	nd	nd	6		nd
	901.84	0.3	0.06	nd	nd	6		nd
	901.96	0.3	0.14	nd	nd	6		nd
	902.13	0.3	bdl	nd	nd	6		nd
	902.39	0.6	0.47	nd	nd	6		nd
	903.34	40.8	0.11	nd	nd	6		nd
	903.51	0.5	0.47	nd	nd	6		nd
	909.61	0.5	bdl	nd	nd	6		nd
	910.76	0.3	bdl	nd	nd	6		nd
	911.9	0.4	0.02	nd	nd	6		nd
	912	0.6	bdl	nd	nd	6		nd
	914.48	0.3	bdl	nd	nd	6		nd
	914.7	0.3	0.09	nd	nd	6		nd
	918.35	0.3	0.06	nd	nd	6		nd
	919.89	bdl	bdl	nd	nd	6		nd
	921.98	9.6	0.02	nd	nd	6		nd
	922.3	9.58	0.02	nd	nd	5		nd
	923.7	27.32	0	nd	nd	5		nd
	923.71	18.8546	bdl	nd	nd	5		nd
	923.71	27.3	0	nd	nd	6		nd
	923.95	19.3	bdl	nd	nd	6		nd
	924.08	18.9	bdl	nd	nd	6		nd
	927.6	40.7	bdl	nd	nd	6		nd
	929.4	43.1	bdl	nd	nd	6		nd
	930.08	0.3	bdl	nd	nd	6		nd
	930.2	0.5	0	nd	nd	5		nd
	930.2	0.136704	bdl	nd	nd	4		nd
	930.2	0.5	0	nd	nd	6		nd
	930.24	0.3	bdl	nd	nd	6		nd
	931.15	0.4	0.03	nd	nd	6		nd
Basaltic basement
765D-2R-2-1a W, 7.0--9.0 cm matrix	956.17	13.45	bdl	1.61775	nd	1		22.9714
765D-2R-2-1a W, 7.0--9.0 cm alteration rim	956.17	4.44	bdl	1.52117	nd	1		23.3148
765D-2R-2-1a W, 7.0--9.0 cm basalt	956.17	bdl	bdl	nd	nd	1		nd
765D-5R-8-10 W, 94.0--97.0 cm matrix	993.455	104.12	bdl	2.35	nd	1		29.0891
765D-5R-8-10 W, 94.0--97.0 cm alteration rim	993.455	4.81	bdl	0.350833	nd	1		28.8275
765D-5R-8-10 W, 94.0--97.0 cm basalt	993.455	2.02	bdl	nd	nd	1		21.7399
765D-9R-3-8 W, 62.0--75.0 cm matrix	1024.53	107.25	bdl	2.34767	nd	1		28.714
765D-9R-3-8 W, 62.0--75.0 cm vein	1024.53	27.52	bdl	nd	nd	1		nd
765D-14R-1 W, 0.0--4.0 cm matrix	1063.92	95.26	bdl	2.09267	nd	1		29.4713
765D-14R-1 W, 0.0--4.0 cm alteration rim	1063.92	6.37	bdl	0.0421667	nd	1		28.062
765D-14R-1 W, 0.0--4.0 cm basalt	1063.92	4.45	bdl	0.918167	nd	1		28.6455
765D-25R-1-4 W, 30.0--35.0 cm matrix	1166.83	98.99	bdl	2.06967	nd	1		28.7457
765D-25R-1-4 W, 30.0--35.0 cm alteration rim	1166.83	2.24	bdl	nd	nd	1		nd
765D-25R-1-4 W, 30.0--35.0 cm basalt	1166.83	1.96	bdl	nd	nd	1		nd
Trenchfill
DODO 205P	2.37	1.63579	-3.2225	0.394252	-22.393
DODO 205P	0.83	1.49737	-1.56567	0.553751	-23.491
RAMA 47P	1.17	0.724241		0.47652	-22.536
DODO 239P	1	bdl		0.823708	-20.623
MSN 35G	0.6	bdl		1.71967	-22.507
VM28_1	2.02	0.562695		0.617462	-21.223
VM28_2	1.42	0.370651		0.420933	-22.058
VM24_188	0.37	bdl		1.11503	-21.383

## Sheet: Sheet2
Table S1. Concentrations and isotopic compositions of carbonate and organic C
(new isotope data obtained at Lehigh University)
DSDP 211
Sample	Depth (mbsf)	CaCO3 (wt %)	Organic C (wt % C)	Carbonate δ13C (‰ VPDB)	Organic C δ13C (‰ VPDB)	Carbonate δ18O (‰ VSMOW)	Data source
	1.86	0	0.853	n.d.	-22.066		1
	2.69	0	0.374	n.d.	-22.547		1
	7.13	0	0.552	n.d.	-19.134		1
	7.58	1	0.2				2
	13.61	0	0.856	n.d.	-21.456		1
	62.54	0	0.45	n.d.	-21.496		1
	96.75	0	0.26	n.d.	-22.294		1
	98.32	0	0.523	n.d.	-22.902		1
	134.86	0	0.25	n.d.	-22.828		1
	137.77	0	0.272	n.d.	-22.719		1
	182.37	0	0.133	n.d.	-24.767		1
	185.59	0	0.266	n.d.	-22.391		1
	185.69	0	0.27	n.d.	-22.606		1
	188.47	0	0.196	n.d.	-24.626		1
	229.31	0	0.252	n.d.	-22.646		1
	257.27	0	0.238	n.d.	-21.876		1
	295.59	0	0.364	n.d.	-21.829		1
	297.71	0	0.249	n.d.	-22.427		1
	411.74	12	0				2
	411.95	67	0				2
211-13R-1 W, 26.0 27.0 cm	418.765	0.6	0.044177	-1.10283	n.d.	n.d.	1
Basaltic basement
211-14R-2 W, 27.5 28.5 cm basalt	429.78	0	0				1
211-14R-2 W, 27.5 28.5 cm vein	429.78	44.32	b.d.l.	1.68			1
211-14R-2 W, 27.5 28.5 cm alteration rim	429.78	2.09	b.d.l.	-0.6			1
211-15R-1 W, 35.0 36.5 cm	437.858	0	0.0445455				1
211-15R-4 W, 34.0 35.5 cm	442.348	0	0.0486357				1
211-15R-4 W, 34.0 35.5 cm	442.348	48.79	b.d.l.	1.368			1
DSDP 213
Sample	Depth (mbsf)	CaCO3 (wt %)	Organic C (wt % C)	Carbonate δ13C (‰ VPDB)	Organic C δ13C (‰ VPDB)		Data source
213-1R-3 W, 125.0 126.0 cm	4.255	0	0.15	n.d.	-23.26		1
213-7R-1 W, 76.0 77.0 cm	57.265	0	0.2	n.d.	-24.11		1
213-8R-5 W, 75.0 76.0 cm	72.755	2.81	0.14	n.d.	-23.8		1
213-12R-4 W, 72.0 73.0 cm	109.225	0	0.09	n.d.	-24.54		1
213-14R-3 W, 75.0 76.0 cm	126.755	0	0.26	n.d.	-15.77		1
213-15R-6 W, 100.0 101.0 cm	141.005	83.6985	0	1.542	-23.26	29	1
DSDP 260
Sample	Depth (mbsf)	CaCO3 (wt %)	Organic C (wt % C)	Carbonate δ13C (‰ VPDB)	Organic C δ13C (‰ VPDB)		Data source
	0.2	65	0.1				3
	3.3	5	0.2				3
	47.3	89	0.1				3
260-2R-3 W, 99.0 100.0 cm	47.995	79.8493	0.0689333	0.829	-23.811	30.8	1
	92.9	0	0.2				3
	94.7	0	0.2				3
	97.7	86	0.1				3
260-3R-5 W, 75.0 76.0 cm	98.255	80.7505	0	1.3605	n.d.	19.8	1
	129.7	11	0.5				3
	135.7	33	0.5				3
	158.2	1	0.1				3
260-5R-6 W, 75.0 76.0 cm	166.255	0	0.113348	n.d.	-28.378	n.d.	1
	177.5	43	0.1				3
	196.2	0	0.1				3
	199.2	0	0.1				3
	202.2	0	0.1				3
	221.8	0	0.1				3
260-8R-6 W, 75.0 76.0 cm	223.255	0	0.0460061				1
260-9R-1 W, 144.0 145.0 cm	235.445	22.2901	0	4.28983	-24.695	29.8	1
	244.3	58	0.1				3
	253.2	54	0.1				3
	262.9	38	0.1				3
260-12R-1 W, 52.0 55.0 cm	263.035	18.2163	0.0347257	3.39	-26.66	30.3	1
	272.6	10	0.1				3
260-13R-1 W, 80.5 82.0 cm	272.812	11.8102	0.0403874	2.655	-26.829	29.4	1
	282.4	0	0.1				3
	294.2	2	0.2				3
260-15R-4 W, 72.0 74.0 cm	296.23	8.07592	0.131232	0.495167	-25.738	n.d.	1
	301.3	2	0.1				3
260-16R-2 W, 61.0 62.0 cm	302.615	0	0.216543	n.d.	-26.829	n.d.	1
260-17R-1 W, 99.0 100.0 cm	310.995	29.0549	0	2.016	-25.518	28.4	1
	311.3	26	0.1				3
	320.5	23	0.1				3
Basaltic basement
260-20R-1 W, 40.0 42.5 cm	329.413	0	0.0464959			n.d.	1
DSDP 261
Sample	Depth (mbsf)	CaCO3 (wt %)	Organic C (wt % C)	Carbonate δ13C (‰ VPDB)	Organic C δ13C (‰ VPDB)		Data source
261-2R-2 W, 86.0 89.0 cm	11.875	0	0.490447	n.d.	-21.315	n.d.	1
	48.5	64	0.1				3
	50.7	48	0.3				3
261-3R-4 W, 25.0 26.0 cm	52.255	6.91152	0	-3.32983	n.d.	n.d.	1
	95.9	73	0.2				3
261-4R-2 W, 26.0 27.0 cm	96.765	72.4742	0	0.672	n.d.	29.9	1
	162.2	0	0.1				3
261-5R-1 W, 71.0 72.0 cm	162.215	2.89907	0.0638465	n.d.	-24.839	n.d.	1
	171.2	0	0.1				3
	174.2	0	0.1				3
261-6R-3 W, 75.0 76.0 cm	174.755	0	0	n.d.	-26.171	n.d.	1
	177.2	0	0.1				3
	180.7	0	0.1				3
	183.7	0	0.1				3
	193.2	0	0				3
261-8R-3 W, 72.0 73.0 cm	193.725	2.75981	0.092289	n.d.	-24.985	n.d.	1
	196.2	0	0.1				3
	201.2	0	0.1				3
	202.7	0	0.1				3
	230	1	0.4				3
	247.2	0	0.1				3
261-14R-1 W, 83.5 85.0 cm	247.843	0	0.183986	n.d.	-25.096	n.d.	1
	256.6	0	1.4				3
	266.9	0	0.3				3
	305.2	0	0.2				3
	305.7	0	0.3				3
261-19R-2 W, 75.0 76.0 cm	306.255	0.904934	0.194551	n.d.	-25.739	n.d.	1
	307.3	0	0.2				3
	308.7	0	0.1				3
	310.2	0	0.1				3
	315.2	0	0.2				3
	333	0	0.1				3
	336.9	1	0.1				3
	342.2	0	0.1				3
	345.2	0	0.1				3
261-22R-3 W, 75.0 76.0 cm	345.755	0	0.218036	n.d.	-24.902	n.d.	1
	348.2	0	0.2				3
	361.2	0	0.2				3
	364.2	0	0.3				3
	380.7	0	0.2				3
261-25R-2 W, 65.0 66.0 cm	401.155	0	0.304391	n.d.	-26.653	n.d.	1
	402.2	0	0.2				3
	418.3	1	0.2				3
	437.3	0	0.1				3
	447.3	28	0.1				3
	449.7	1	0				3
261-28R-3 W, 75.0 76.0 cm	450.255	28.8375	0	1.132	-26.617	27.4	1
	467.2	1	0				3
261-29R-2 W, 80.0 81.0 cm	467.805	5.72928	0.035569	0.763	-25.589	27.5	1
	468.7	3	0.1				3
	486.2	21	0.2				3
	487.7	34	0.1				3
	505.2	3	0.1				3
	506.7	13	0.1				3
	508.2	2	0.1				3
261-31R-4 W, 61.0 62.0 cm	508.615	18.9123	0.079056	-1.42	-25.664	26.2	1
	509.7	0	0.1				3
	524.2	6	0.1				3
	525.7	10	0.1				3
261-32R-3 W, 75.0 76.0 cm	526.255	3.95353	0.0766836	0.206	-28.095	27	1
261-33R-1 W, 13.0 16.0 cm	532.145	0	0			n.d.	1
Basaltic basement
261-37R-2 W, 29.5 30.5 cm basalt	554.3	2.01445	0	-0.858		n.d.	1
261-37R-2 W, 29.5 30.5 cm vein	554.3	84.81	0	1.05		25.6	1
261-39R-1 W, 70.0 71.5 cm basalt	570.707	0	0	n.d.			1
261-39R-1 W, 70.0 71.5 cm matrix	570.707	82.64	0	1.764		n.d.	1
261-39R-1 W, 70.0 71.5 cm alteration rim	570.707	0.6	0	n.d.			1
DSDP 262
Sample	Depth (mbsf)	CaCO3 (wt %)	Organic C (wt % C)	Carbonate δ13C (‰ VPDB)	Organic C δ13C (‰ VPDB)		Data source
	3.2	47	0.6				3
	8.2	43	1.1				3
262-3R-2 W, 24.0 25.0 cm	16.245	31.1386	0.299203	0.225	-19.916	29.0308	1
	17.7	33	1.2				3
	20.6	34	1.3				3
	27.2	32	1.3				3
	34	24	1.2				3
	36.7	33	1.4				3
	39.7	33	1.1				3
	43.2	33	1.3				3
	46.2	37	1.3				3
	49.2	37	1.3				3
262-6R-5 W, 33.0 34.0 cm	49.335	35.1016	0.365438	0.598	-19.471	29.039	1
	56.3	36	1.3				3
	58.7	34	1.3				3
	62.2	31	1.1				3
	65.2	33	1.2				3
	68.2	34	1.1				3
	72.3	34	1				3
	74.7	34	1.1				3
	77.7	31	1.1				3
	81.2	31	1				3
	84.2	30	1				3
	87.2	74	0.3				3
	90.7	28	0.7				3
	93.7	29	0.9				3
	96.8	34	0.8				3
262-11R-5 W, 76.0 77.0 cm	97.265	23.0206	0	0.0216	n.d.	28.3952	1
	100.2	30	0.9				3
	103.2	74	0.3				3
	106.2	28	0.8				3
	109.7	31	1				3
	112.7	29	1				3
	115.7	26	0.8				3
	119.2	30	0.9				3
	122.2	29	0.9				3
	125.2	32	0.9				3
	128.7	32	0.8				3
	131.7	30	0.7				3
	134.7	32	0.8				3
	138.2	30	0.8				3
	141.2	30	0.8				3
	144.2	29	0.7				3
	147.7	37	0.9				3
	150.7	34	1.3				3
262-17R-4 W, 78.0 79.0 cm	152.785	30.6403	0.608399	-0.0645	-20.35	29.3047	1
	153.7	40	0.4				3
	157.2	29	1				3
	160.2	32	1				3
	163.2	30	1				3
	166.7	31	0.8				3
	169.7	31	0.8				3
	172.7	30	0.9				3
	176.2	32	0.6				3
	179.2	31	0.6				3
	182.2	37	0.6				3
	185.7	33	0.8				3
	188.7	38	1				3
	191.7	34	0.9				3
	198.2	30	0.7				3
262-22R-4 W, 25.0 26.0 cm	199.755	16.8267	0.432512	0.114	-21.461	28.9511	1
	201.2	32	0.7				3
	207.7	42	0.5				3
	210.7	39	0.9				3
	214.2	36	0.8				3
	217.2	36	0.8				3
	220.2	36	0.7				3
	226.7	37	1				3
	229.7	40	0.9				3
	233.2	45	0.7				3
	236.2	41	0.7				3
	239.2	48	0.7				3
	242.7	41	0.9				3
	245.7	43	0.7				3
	248.7	47	0.7				3
262-27R-5 W, 25.0 26.0 cm	248.755	42.2984	0.453689	0.614	-21.359	29.4284	1
	261.7	62	0.8				3
	264.7	65	0.4				3
	267.7	59	0.7				3
	271.2	58	0.7				3
	274.2	67	0.6				3
	277.2	64	0.8				3
	281.6	67	0.5				3
	283.7	61	0.5				3
	286.7	65	0.6				3
	290.2	70	0.9				3
	293.2	62	0.8				3
	296.2	68	0.6				3
	299.9	67	0.9				3
262-33R-2 W, 25.0 26.0 cm	301.255	61.0948	0.178594	0.539	-19.202	30.1816	1
	302.7	63	0.9				3
	305.7	62	1				3
	309.2	65	0.9				3
	312.2	64	0.9				3
	319	72	0.7				3
	321.7	66	0.9				3
	324.7	62	0.7				3
	328.2	48	1				3
	331.2	59	1.1				3
	334.2	58	0.9				3
	337.7	64	0.8				3
	340.7	67	0.7				3
	343.6	69	0.6				3
	347	62	0.7				3
	350.2	79	0.5				3
262-38R-3 W, 25.0 26.0 cm	350.255	76.247	0	-0.105	-21.413	30.0477	1
	353.2	82	0.3				3
	359.7	77	0.4				3
	362.7	80	0.3				3
	366.2	57	0.5				3
	369.2	57	0.5				3
	372.3	80	0.4				3
	378.7	89	0.2				3
	381.7	78	0.4				3
	385.2	64	0.5				3
	388.2	56	0.4				3
262-42R-5 W, 25.0 26.0 cm	391.255	65.7816	0.44885	-0.177	-20.152	29.7912	1
	391.5	78	0.3				3
	404	80	0.3				3
	405.7	77	0.3				3
	407.2	80	0.3				3
	413.6	99	0.1				3
	414.7	99	0.2				3
	419.7	98	0.2				3
262-45R-6 W, 115.0 116.0 cm	422.155	100	0	0.802	n.d.	28.387	1
ODP 765
Sample	Depth (mbsf)	CaCO3 (wt %)	Organic C (wt % C)	Carbonate δ13C (‰ VPDB)	Organic C δ13C (‰ VPDB)		Data source
	0.53	68.3	0.8				4
	0.96	13					4
	2.28	52.5					4
	3.42	35.7					4
	4.45	68.5	0.33				4
	4.88	0.4					4
	4.98	55.2	0.63				5
	5.95	67.3	0.43				4
	5.95	72.5	1.33				4
	5.97	71.1	0.8				4
	8.11	2.5					4
	8.18	72.3					4
	9.83	71.4					4
	12.95	2.9					4
	13.24	56.1	0.51				5
	13.53	3.4	0.82				5
	13.75	0.8	1.08				4
	13.87	5.4	0.98				5
	14.11	67.8	0.74				5
	14.7	81.38	0.13				5
	14.71	81.4	0.13				4
	15.11	1	0.67				5
	15.25	0.3	1.06				4
	17.14	0.3					4
	17.55	29.3					4
	18.18	0.6	0.72				5
	19.13	70.6	0.22				5
765B-3H-1 35-44 cm	19.15	65.8737	0.3072	1.69	-19.69	30.56	1
	19.63	69.4					4
	23.25	0.4	1.18				4
	24.55	1.6					4
	24.75	0.3	1.09				4
	26.07	54.6					4
	26.53	66.1					4
	32.95	56.6	0.94				4
	33	0.5	1.05				4
	35.78	17.8					4
	36.2	2.42	0.91				5
765B-4H-6 23-22cm	36.23	0.163816	b.d.l.	-1.63	n.d.	30.25	1
	40.45	31.7					4
	42.55	56.2	0.55				4
	42.6	55.7	0.57				4
	47.5	74.47	0.13				5
	52.25	62.1	0.51				4
	52.3	56.9	0.98				4
	56.29	32.7					4
	57.48	b.d.l.	0.2202				5
	60.78	70.3	0.58				5
	61.85	62.1	0.71				4
	61.9	69.2	1.08				4
	64.45	65.6					4
	71.55	70.9	0.97				4
	71.6	71.1	0.69				4
	74.49	48.9					4
	74.89	b.d.l.	0.0607				5
765B-8H-6 85-90 cm	75.45	38.8889	0.29	0.64	-19.04	30.05	1
	75.45	46.9	0.29				5
	81.25	71.8	0.08				4
	81.3	74.8	0.01				4
	82.19	68.5					4
765B-9H-6 98-104 cm	85.28	49.3496	b.d.l.	1.39	n.d.		1
	85.34	55.3	0.66				5
	90.85	57.9	0.27				4
	90.9	61.3	0.16				4
	92.09	0.9					4
	93.24	4.8					5
765B-10H-5 89-95 cm	93.29	b.d.l.	0.5466	n.d.	-19.44	n.d.	1
	97.69	0.6					4
	97.9	61.89	0.15				5
	100.5	56.8	0.55				4
	110.05	72.2	0.08				4
	110.1	67.8	0.47				4
	110.54	69.8	0.04				5
	112.29	8.7					4
	114.15	0.5	0.27				5
	118	b.d.l.	0.3249				5
	118.08	60.9	0.31				5
	119.7	62.9	0.06				4
	120.24	61.1					4
	129.3	53.2	0.68				4
	130.13	62.3	0.12				5
	132.7	41					4
	134.91	78.6					4
765B-15H-2 76-88 cm	136.76	60.9456	0.3176	-0.29	-19.7	27.5	1
	136.8	60	0.3				5
	136.88	0.0647978					5
	136.88	0.5	0.29				5
	137.15	45.6263					5
	137.15	63.1	0.09				4
	137.2	63.47	0.05				5
	137.5	59.64	0.24				5
	137.7	73.22	0.08				5
765B-15H-3 20-32 cm	137.7	68.2801	b.d.l.	-0.08	n.d.	27.62	1
	137.7	73.2	0.08				4
	137.8	1.17	0.29				5
765B-15H-3 32-44 cm	137.82	0.435321	0.398	-1.04	-21.678	30.51	1
	137.82	1.2	0.29				4
	138.26	59.9	0.31				4
	138.95	9.9	0.5				4
	139	24.6	0.32				4
	140.73	36.5	0.31				5
	140.99	58.8	0.19				5
	141.66	58.5	0.11				5
	144	57.48	0.13				5
765B-15H-7 52-56 cm	144.02	55.433	0.13	0.58	-21.3	28.59	1
	144.02	57.5	0.13				4
	144.62	57.2	0.13				5
765B-16H-1 50-56 cm	144.7	52.743	b.d.l.	1.12	n.d.	29.92	1
	148.7	44.4	0.61				4
	158.4	22.7	0.33				4
	160.46	b.d.l.	0.2067				5
765B-17H-5 56-62 cm	160.46	65.873	0.1	1.21	-22.133	29.05	1
	160.53	52	0.08				5
	161.4	2.3					4
765B-18H-1 13-19 cm	163.73	3.35032	b.d.l.	0.719	n.d.	29.57	1
	163.76	60.1	0.3				4
	167.5	68.3	0.3				4
	168.95	70	0.27				4
	171.64	1.3					4
765B-19X-3 20-26 cm	176.5	61.3681	b.d.l.	1.19	n.d.	28.09	1
	177.75	41.9	0.57				4
	185.75	74.7					4
	185.8	74.72					5
	187.5	36.7	1				4
	193.37	56.5					4
	195.65	80.9	0.22				4
	195.7	80.3	0.28				4
765B-21X-3 64-70 cm	196.34	3.30755	b.d.l.	2.04	n.d.	34.74	1
	197.08	72.5					4
765B-22X-1 88-94 cm	203.28	63.1252	0.1892	0.478	-20.68	29.09	1
	203.34	73.8	0.07				5
	204.7	62					4
	206.27	85.8					4
	206.9	72.6	0.21				4
	207.5	82.6					4
	212.41	75.5					4
	213.6	63.4	0				4
	214	80.4					4
765B-23X-2 91-97 cm	214.51	68.6379	b.d.l.	1.78	n.d.	30.06	1
	222.45	72.3					4
	224.58	74.6					4
	226.25	89.1	0.07				4
	226.3	70.4	0.23				4
765B-24X-4 77-83 cm	227.07	10.5789	b.d.l.	1.97	n.d.	33.49	1
	227.15	63.1					4
	232	62.5					4
765B-26X-1 63-69 cm	241.83	76.7015	b.d.l.	1.59	n.d.	30.86	1
	241.89	91.6	0				4
	241.9	91.96	0				5
	243.71	69.9					4
	244.33	78.6					4
	244.92	68.9	0.13				5
	245.65	66.6	0.14				4
765B-27X-1 41-46 cm	251.31	23.3777	0.26	n.d.	-26.724	nd	1
	251.31	74.6	0.26				5
	251.38	74.1					4
	253.85	69.2	0.44				4
	253.9	79.1	0.13				4
	254.54	60.5					4
	260.79	79					4
765B-28X-1 28-34 cm	260.88	62.7058	0.3216	2.37	-19.86	30.98	1
	260.9	80.88	0.25	1.32	n.d.	n.d.	1
	260.94	80.9	0.25				4
	263	71.5					4
	263.55	81.1	0.17				4
	271.07	53.4					4
	271.7	77.5	0.32				4
765B-29X-2 21-25 cm	271.91	79.4902	b.d.l.	1.71	n.d.	29.56	1
	280.25	77.8					4
765B-30X-1 86-92 cm	280.76	63.411	b.d.l.	1.43	n.d.	30.63	1
	280.85	84.7	0.24				4
	291.89	70.6					4
	294	79.8	0.14				4
	294.1	72.8	0.19				4
	294.2	80.6					4
	299.75	77.6					4
	302.06	83.742					5
	302.06	82.2	0.13				5
	302.25	90.6	0.39				4
	302.59	80.8					4
	310.11	73.1					4
	311.21	68.8	0.01				5
	313.5	80.1	0.12				4
	314.34	80.3					4
	319.58	78.1					4
	320.11	83.3	0.17				4
765B-34X-CC 17-23 cm	321.9	33.8799	b.d.l.	1.82	n.d.	30.12	1
	329.4	80.2					4
	329.8	80.1	0.32				4
765B-35X-2 37-42 cm	330.17	78.5151	0.1783	1.95	-20.6	30.33	1
	339.4	70.9	0				4
	339.79	86.6					4
765B-36X-2 81-86 cm	340.21	87.4562	b.d.l.	2.24	n.d.	30.38	1
	340.8	78.7	0.29				4
	347.92	87.1					4
	348.958	83.6	0.17				4
	350.43	95.1					4
765B-37X-CC 19-25 cm	350.7	73.3059	0.3945	2.35	-19.29	29.66	1
	357.1	76.8	0.18				4
	358.14	82.4					4
	358.69	91.5					4
765C-2R-2 90-99 cm	362	81.2602	b.d.l.	1.77	n.d.	30.55	1
	366.9	21.0624		2.04	n.d.		1
	367.05	78.5					4
	367.46	95.4	0				4
	367.51	95.1	0.12				4
765C-3R-1 131-133 cm	370.61	7.79075	b.d.l.	2.48	n.d.	35.04	1
	372.3	71.9					4
	376.4	72.9	0.29				4
	382	51.8					4
	383.4	71.6	0.09				4
765C-5R-3 45-49 cm	392.05	7.75505	b.d.l.	1.71	n.d.	30.29	1
765C-6R-1 143-149 cm	399.73	73.2573	0.336	1.64	-18.978	28.44	1
	402.8	80.2					4
	409.45	59.8					4
765C-7R-2 27-32 cm	409.77	4.61299	b.d.l.	2.11	n.d.	32.77	1
	410.11	84.3					4
	410.29	61					4
	410.48	7.3					4
	413.25	17.9					4
765C-8R-2 114-120 cm	420.34	30.0855	b.d.l.	1.96	n.d.	27.5	1
	420.65	49					4
	423.06	16.8					4
	423.18	65.4					4
	423.35	88.5					4
	430.3	59					4
	438	12.6					4
	440.9	50.9	0.21				4
	446.84	4.77234	0.1113	n.d.	-26.022	n.d.	1
	446.84	32.9	0.31				5
765C-11R-1 88-91 cm	446.88	71.7018	b.d.l.	-3.31	n.d.	28.35	1
765C-11R-1 91-93 cm	446.91	79.074	b.d.l.	2.17	n.d.	29.95	1
765C-11R-1 97-100 cm	446.97	70.0947	0.1079	1.7	-21.603	30.63	1
	446.97	81.8	0				5
	447.19	80.7	0.09				5
	447.33	83.8	0.04				5
	449	99.1					4
	451.11	1.1	0.18				5
	459.65	64.6					4
	464.6	76.1					4
	466.71	4.1	0				5
	474.1	51.1					4
765C-14R-1 97-104 cm	475.07	0.0471321	b.d.l.	-1.46	n.d.	28.66	1
	483.7	8.1					4
	484.85	2.3	0.2				4
	493.2	1.3					4
	493.58	0.5					4
	493.99	47.3					4
	497.15	57.3					4
	498.6	51.8					4
	504.56	54.2	0				4
765C-17R-2 60-65 cm	504.6	54.23	b.d.l.	2.22	n.d.	30.41	1
	504.93	0.3					4
	505.4	4.3					4
	506.63	69.3					4
	511.9	1.2					4
	516.3	76.5	0				4
	516.4	76.5					4
	522	81.3					4
	522.8	29.8					4
	523.52	0.4					4
	524.77	0.6					4
	531.57	0.153581					5
	532.25	1.5					4
	540.4	1.2					4
	551.88	1.02594					5
	551.88	2.4	0.04				5
	553	68.6	0				4
	554.62	3.3					4
765C-23R-4 62-69 cm	564.82	62.3661	b.d.l.	3.44	n.d.	28.98	1
	566.25	32.4					4
	570.22	0.04486					5
	570.22	0.3	0.03				5
	573.8	57.6					4
	573.84	79					4
	574.42	2.3					4
	574.43	70.8					4
	574.5	0.67	0				5
	574.51	0.144866					5
	574.51	0.6	0.05				4
	574.62	60.7					4
	579.92	68.771					5
	580.8	0.5	0.04				4
	581.4	0.42	0.03				5
	581.42	0.4					4
	581.46	0.4	0.03				4
	581.86	56.2					4
	583.06	0.5	0.03				5
	584.85	56.9					4
	584.9	63.8	0				4
	592.58	35.7					4
	592.92	4.9	0.01				4
	593	4.83	0.02				5
	593.59	0.3					4
	593.6	0.4					4
	593.67	0.7	0.09				4
	593.93	12.5					4
	598.19	0.3					4
	598.36	0.4					4
	598.7	13.3					4
	598.95	3.2					4
	599.3	0.25	0.01				5
	599.34	0.0386315					5
	599.41	0.3	0.01				4
	607.55	0.0233666					5
	607.55	0.2	0.01				5
	607.55	0.2					4
	608.45	33.1					4
	609.32	0.3	0.01				4
	609.65	14.9					4
	609.9	7.7					4
	609.9	16.2	0				4
765C-28R-3 45-53 cm	610.45	14.3127	b.d.l.	3.46	n.d.	29.05	1
	610.5	22.24	0.11				5
	610.52	22.3	0.1				4
	619.42	33.7					4
	620.16	2.58874					5
	620.23	5.3	0.06				5
	622.66	0.0662705					5
	626.67	0.3					4
	627.55	0.6	0.04				4
	627.6	0.67	0.03				5
	628.44	0.4	0				4
	629.66	0.0898473					5
	630.42	2					4
	630.5	3.3					4
	630.64	4					4
	630.64	4.4					4
	630.72	2.4					4
	630.81	6.7					4
	630.92	0.3					4
	631.03	0.3					4
	631.12	0.3					4
	631.3	0.2	0.05				4
	631.38	0.0233293					5
	631.4	0.17	0.05				5
	631.91	0.7					4
	632	1.3					4
	632.1	0.5					4
	632.21	0.3					4
	632.31	0.3					4
	633.93	0.4	0				4
	634.28	9.3					4
	634.39	8.4	0.06				4
	638.01	26.3	0				4
	638.18	25.1					4
	647.37	0.3					4
	647.9	3					4
	654.9	3	0.58				4
	656.18	0.6					4
	657.37	0.139621					5
	665.9	4.3					4
	668.55	21.7	0.1				4
	675.55	19.3					4
	677.3	0.33	0.13				5
	677.34	0.0753089					5
	677.65	6.6					4
	677.96	4.7	0.67				5
	679.43	10.8					4
	690.75	0.8					4
	695.93	17.5					4
765C-37R-3 40-43 cm	696.4	33.0858	0.04	4.55	n.d.	28.74	1
	696.4	34.5	0.06				4
	697.1	54.9					4
	697.4	51.9	0.15				4
	705.45	1.6					4
	714.7	26.2					4
	715.63	3.3					4
	715.71	0.325358					5
	715.71	1	0.04				5
	716.1	20.6	0				4
	724.9	0.5	0.22				5
	724.94	0.7	0.2				4
	725.35	10.1					4
	726.83	0.5					4
	726.89	0.7	0.6				4
	730.99	0.8					4
	740.75	0.6					4
765C-42R-2 41-43 cm	741.71	0.2057	0.1811	n.d.	-23.56	n.d.	1
	741.71	0.6	0.15				5
	743.68	1.7	0.25				4
	744.2	0.6	0.08				4
	744.3	0.8					4
	744.56	0.5					4
	744.6	0.7					4
	756.6	0.8					4
	760.73	0.029159					5
	761.59	0.7					4
	761.67	4					4
	762.56	1.1	0.51				4
	762.85	1	0.43				4
	763	27.2					4
765C-44R-4 55-59 cm	763.55	0.145795	0.29	n.d.	-24.861	n.d.	1
	763.55	1.1	0.29				5
	763.63	0.5					4
765C-45R-2 70-75 cm	770.4	0.67	0.09	n.d.	-26.38	n.d.	1
	770.4	0.7	0.09				4
	770.41	0.0857618	0.1137				5
	771.68	8.2					4
	771.73	3					4
	772.6	3.6	0.14				4
	773.7	2.3	4.92				4
	774.2	5.4					4
	779.25	0.7					4
	790.95	0.5					4
	793.35	0.4					4
	801.3	1	0.4				4
	801.4	0.5					4
	801.76	5.3					4
	803.97	0.6					4
	807.24	1.1	0.51				4
	807.52	0.3					4
	807.71	1	0.53				4
	810.8	2.1					4
765C-50R-1 110-113 cm	816.7	0.58	0.01	n.d.	n.d.	n.d.	1
	816.7	0.0788081					5
	817.9	0.8					4
	818.55	0.4					4
	821.77	0.9					4
	821.88	1.3					4
	821.98	53.2					4
	823.61	0.4					4
	825.84	0.4	0.18				5
	829.4	1.4	0				4
	831	0.4					4
	832.52	0.4					4
	835.82	0.6	0.3				4
	836.08	0.4					4
	837.34	0.7	0.08				4
	837.34	0.3					4
	837.45	0.3					4
	838.15	2.4					4
	838.33	1.3					4
	838.61	1					4
	844.76	0.0971967					5
	845.12	0.6					4
	847.82	0.3					4
	848.87	8					4
	849.1	5.2					4
	849.25	6.6					4
	852.83	0.3					4
	857.9	0.3	0.14				4
	858	0.3					4
	858.49	0.3					4
	858.72	3					4
	859.1	7.3					4
	859.39	14.7					4
	865.32	1.5					4
	866	20.5					4
	866.07	21.5					4
	866.86	25.3					4
765C-55R-4 2-8 cm	867.52	15.068	0.1204	1.12	-25.828	28.52	1
	875.08	1.4					4
	875.2	24.9					4
	877.09	21.7					4
	878.09	15.2					4
	878.4	18.9					4
	885.8	27.8					4
	886.1	28.2	0.07				4
	890.55	1.4					4
	896.37	0.049375					5
	896.37	0.3	0.01				5
	901.13	0.5	0.08				4
	901.39	0.4	0.05				4
	901.63	0.4	0.07				4
	901.84	0.3	0.06				4
	901.96	0.3	0.14				4
	902.13	0.3					4
	902.39	0.6	0.47				4
	903.34	40.8	0.11				4
	903.51	0.5	0.47				4
	909.61	0.5					4
	910.76	0.3					4
	911.9	0.4	0.02				4
	912	0.6					4
	914.48	0.3					4
	914.7	0.3	0.09				4
	918.35	0.3	0.06				4
	919.89	b.d.l.					4
	921.98	9.6	0.02				4
	922.3	9.58	0.02				5
	923.7	27.32	0				5
	923.71	18.8546					5
	923.71	27.3	0				4
	923.95	19.3					4
	924.08	18.9					4
	927.6	40.7					4
	929.4	43.1					4
	930.08	0.3					4
	930.2	0.5	0				5
	930.2	0.136704					1
	930.2	0.5	0				4
	930.24	0.3					4
	931.15	0.4	0.03				4
Basaltic basement
765D-2R-2-1a W, 7.0 9.0 cm matrix	956.17	13.45	b.d.l.	1.61775		n.d.	1
765D-2R-2-1a W, 7.0 9.0 cm alteration rim	956.17	4.44	b.d.l.	1.52117		n.d.	1
765D-2R-2-1a W, 7.0 9.0 cm basalt	956.17	b.d.l.	b.d.l.			n.d.	1
765D-5R-8-10 W, 94.0 97.0 cm matrix	993.455	100	b.d.l.	2.35		n.d.	1
765D-5R-8-10 W, 94.0 97.0 cm alteration rim	993.455	4.81	b.d.l.	0.350833		n.d.	1
765D-5R-8-10 W, 94.0 97.0 cm basalt	993.455	2.02	b.d.l.			n.d.	1
765D-9R-3-8 W, 62.0 75.0 cm matrix	1024.53	100	b.d.l.	2.34767		n.d.	1
765D-9R-3-8 W, 62.0 75.0 cm vein	1024.53	27.52	b.d.l.			n.d.	1
765D-14R-1 W, 0.0 4.0 cm matrix	1063.92	95.26	b.d.l.	2.09267		n.d.	1
765D-14R-1 W, 0.0 4.0 cm alteration rim	1063.92	6.37	b.d.l.	0.0421667		n.d.	1
765D-14R-1 W, 0.0 4.0 cm basalt	1063.92	4.45	b.d.l.	0.918167		n.d.	1
765D-25R-1-4 W, 30.0 35.0 cm matrix	1166.83	98.99	b.d.l.	2.06967		n.d.	1
765D-25R-1-4 W, 30.0 35.0 cm alteration rim	1166.83	2.24	b.d.l.			n.d.	1
765D-25R-1-4 W, 30.0 35.0 cm basalt	1166.83	1.96	b.d.l.			n.d.	1
Trenchfill
Sample	Lat	Lon	Depth (mbsf)	CaCO3 (wt %)	Organic C (wt % C)		Carbonate δ13C (‰ VPDB)	Organic C δ13C (‰ VPDB)
DODO 205P	2.467	94.617	2.37	2.87	0.394252		0.391232	-22.393
DODO 205P	2.467	94.617	0.83	2.8	0.553751		0.333731	-23.491
RAMA 47P	0.04	96.898	1.17	2.19	0.47652		0.17632	-22.536
DODO 239P	-3.45	99.2	1	b.d.l.	0.823708		0.823708	-20.623
VM 28 357	-7.35	103.117	2.02	1.85	0.617462		0.617161	-21.223
VM 28 357	-7.35	103.117	1.42	1.86	0.420933		0.120933	-22.058
MONS 35G	-10.467	109.767	0.6	b.d.l.	1.71967		1.71967	-22.507
VM 24 188	-11.3	115.667	0.37	b.d.l.	1.11503		1.11303	-21.383
b.d.l.: below detection limit
n.d.: no data
Data sources:
1: This study
2: Bode, G. (1974)
3: Pimm, A. (1974)
4: Ludden et al. (1990)
5: Plank and Ludden (1992)
